# Supplementary material for: Gate bias modulation towards organic electrochemical transistors with ultra-high cycling stability
Source: Royal Society of Chemistry journal article supplement (doi:10.1039/d4ta02276a), 2024-01-01
Supplement: d4ta02276a1.pdf [file d4ta02276a1.pdf]

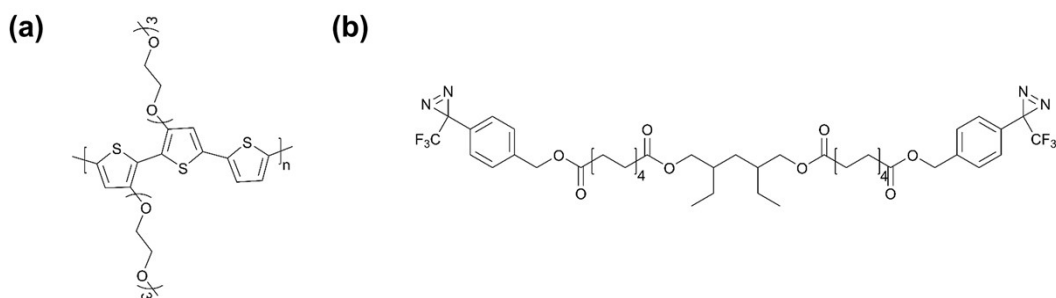

**Figure S1.** Chemical structures of (a) p(g2T-T) and (b) DtFDA.

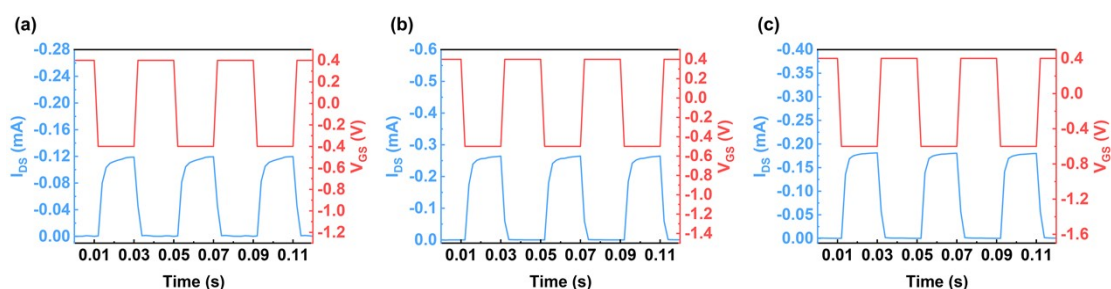

**Figure S2.** Applied square wave of  $V_G$  and corresponding  $I_D$  under different  $V_G$  pulses ( $V_G$  square pulse of 25 Hz,  $V_D = -0.1$  V): (a)  $V_G$  from +0.4 V to -0.4 V, (b)  $V_G$  from +0.4 V to -0.5 V and (c)  $V_G$  from +0.4 V to -0.6 V.

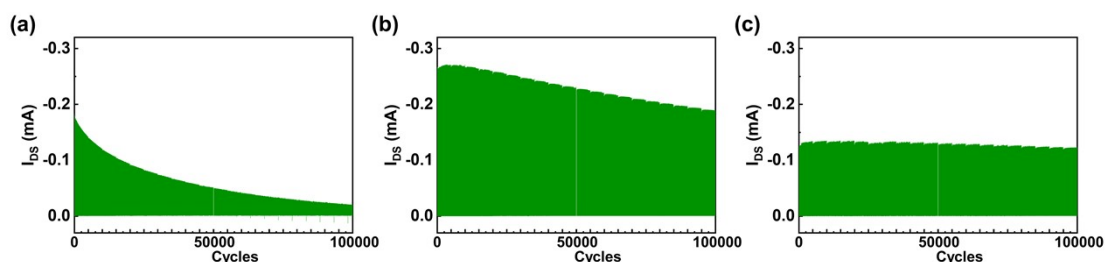

**Figure S3.** Change of  $I_D$  over time of planar p(g2T-T): DtFDA OECTs under different  $V_G$  pulses ( $V_G$  square pulse of 25 Hz,  $V_D = -0.1$  V): (a)  $V_G$  from +0.4 V to -0.6 V, (b)  $V_G$  from +0.4 V to -0.5 V and (c)  $V_G$  from +0.4 V to -0.4 V.

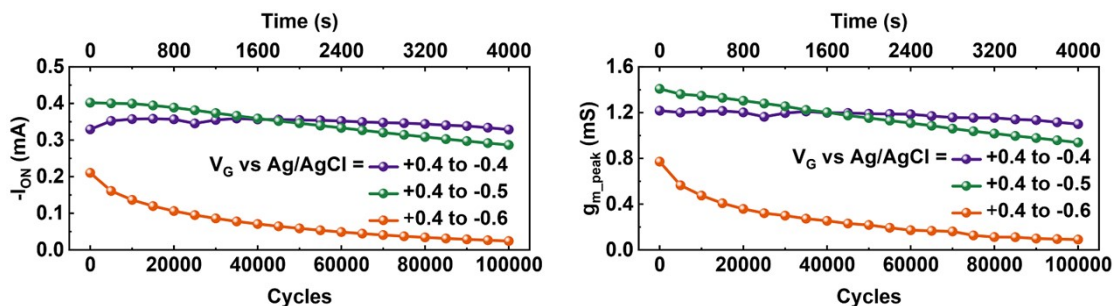

**Figure S4.** Change of (a)  $I_{ON}$  and (b)  $g_{m\_peak}$  over time of planar p(g2T-T): DtFDA OECTs under different  $V_G$  pulse ranges ( $V_G$  square pulse of 25 Hz,  $V_D = -0.1$  V).

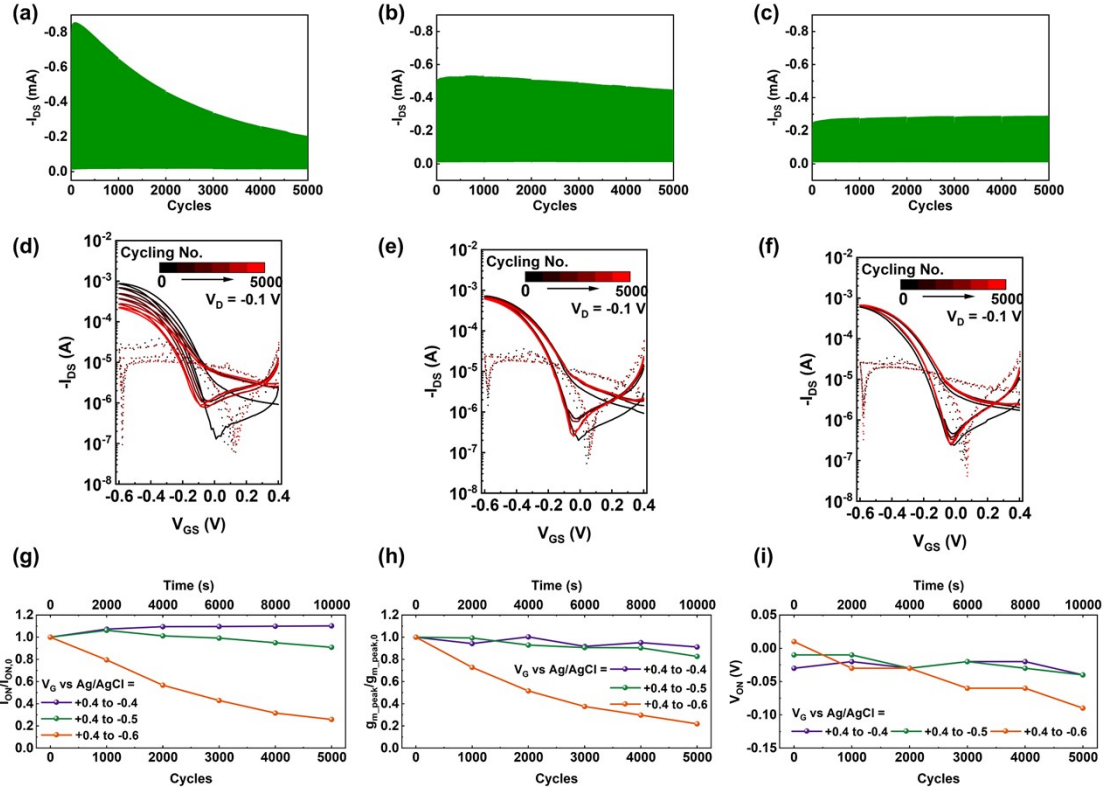

32

33 **Figure S5.** (a)-(c) Change of  $I_D$  over time of planar pure p(g2T-T) OECTs under different  $V_G$  pulses ( $V_G$   
 34 square pulse of 25 Hz,  $V_D = -0.1$  V): (a)  $V_G$  from +0.4 V to -0.6 V, (b)  $V_G$  from +0.4 V to -0.5 V and (c)  
 35  $V_G$  from +0.4 V to -0.4 V. (d)-(f) Transfer characteristics of p-type planar OECTs with pure p(g2T-T)  
 36 during the cycling stability measurements with the  $V_G$  switches from (d) +0.4 V to -0.6 V, (e) +0.4 V to  
 37 -0.5 V and (f) +0.4 V to -0.4 V. (g)-(i) Decay trends of (g)  $I_{ON}$ , (h)  $g_{m\_peak}$  and (i)  $V_{ON}$  of planar OECTs  
 38 based only p(g2T-T).

39

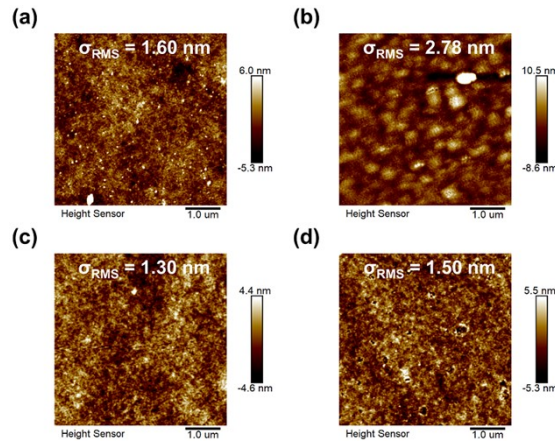

40

41 **Figure S6.** (a)-(b) AFM images of p(g2T-T): DtFDA film on source electrode (a) before and (b) after  
 42 cycling stability measurement. (c)-(d) AFM images of the semiconductor film on drain electrode (c)  
 43 before and (d) after cycling stability measurement.

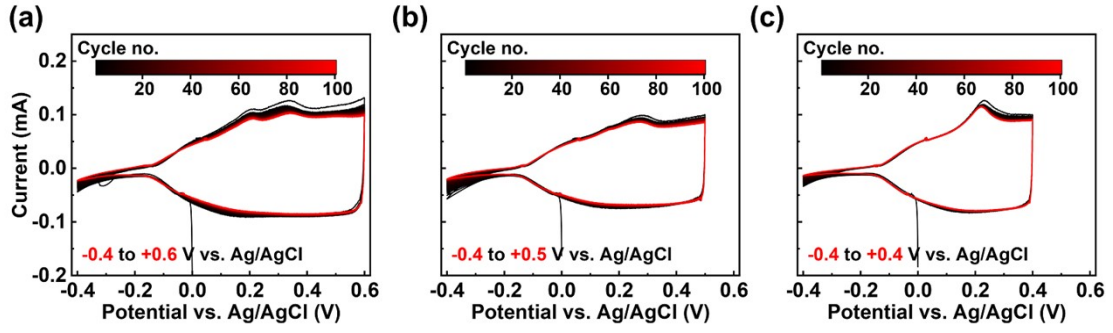

**Figure S7.** Cyclic voltammograms of the of the films cast from pure p(g2T-T) with voltage steps of 1 mV (a) from -0.4 V to +0.6 V, (b) from -0.4 V to +0.5 V and (c) from -0.4 V to +0.4 V.

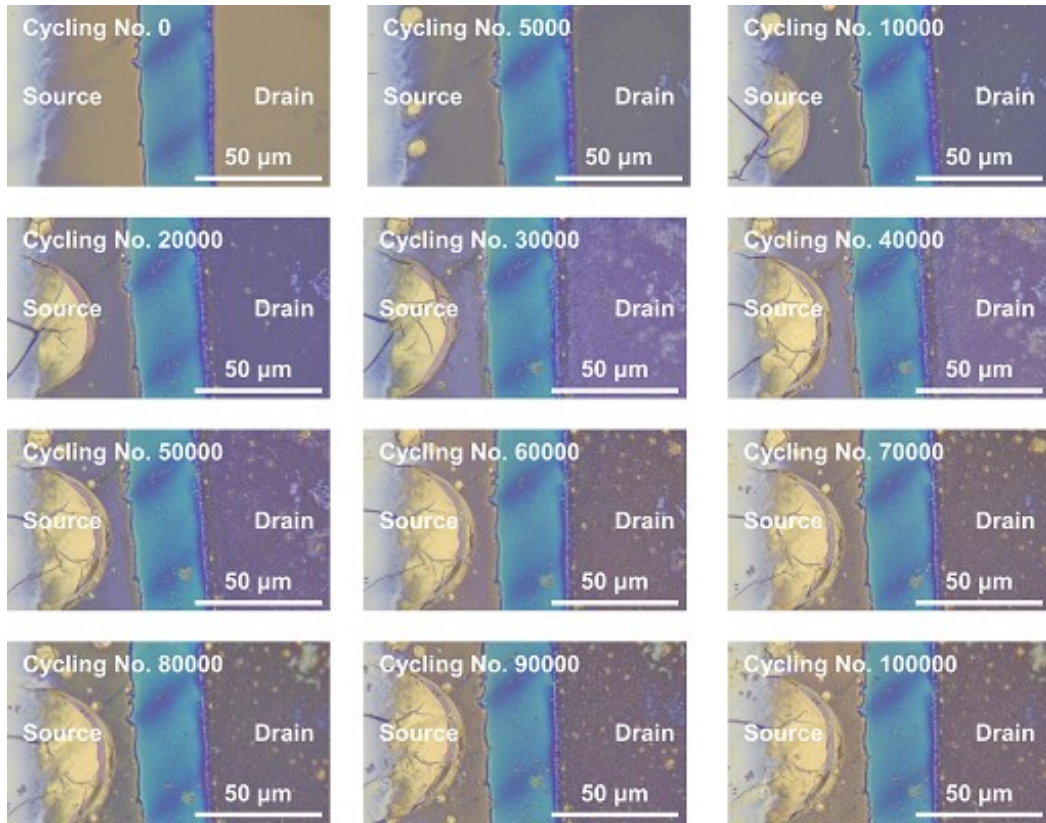

**Figure S8.** Changes in the morphology of the film in glass based planar OEET during long-term cycling stability testing.

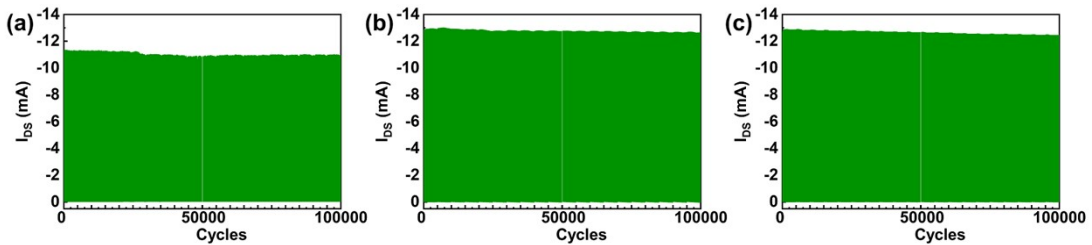

**Figure S9.** Change of  $I_D$  over time of vertical p(g2T-T): DtFDA OEETs under different  $V_G$  pulses ( $V_G$  square pulse of 25 Hz,  $V_D = -0.1$  V): (a) +0.4 V to -0.6 V; (b) +0.4 V to -0.5 V; (c) +0.4 V to -0.4 V.

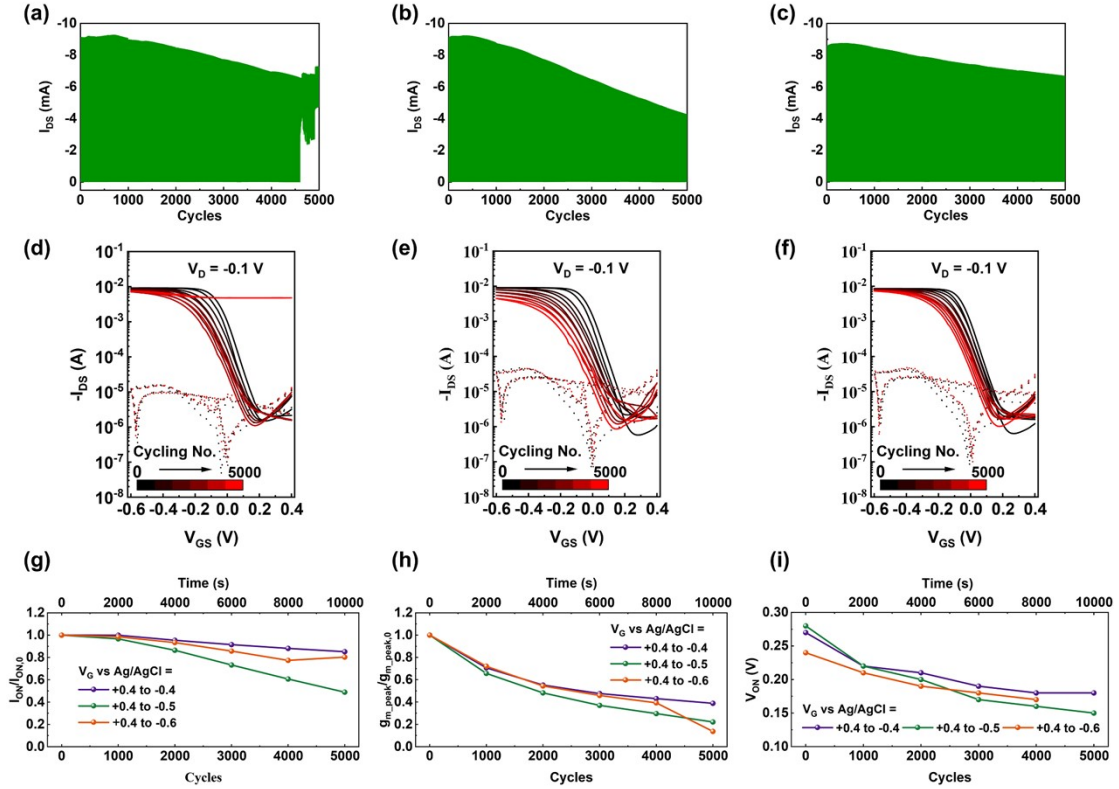

56

57 **Figure S10.** (a)-(c) Change of  $I_D$  over time of vertical pure p(g2T-T) OECTs under different  $V_G$  pulses  
 58 ( $V_G$  square pulse of 25 Hz,  $V_D = -0.1$  V): (a) +0.4 V to -0.6 V, (b) +0.4 V to -0.5 V and (c) +0.4 V to -0.4  
 59 V. (d)-(f) Transfer characteristics of p-type planar OECTs with pure p(g2T-T) during the cycling stability  
 60 measurements with the  $V_G$  switches from (d) +0.4 V to -0.6 V, (e) +0.4 V to -0.5 V and (f) +0.4 V to -  
 61 0.4 V. (g)-(j) Decay trends of (g)  $I_{ON}$ , (h)  $I_{OFF}$ , (i)  $g_{m\_peak}$  and (j)  $V_{ON}$ .

62

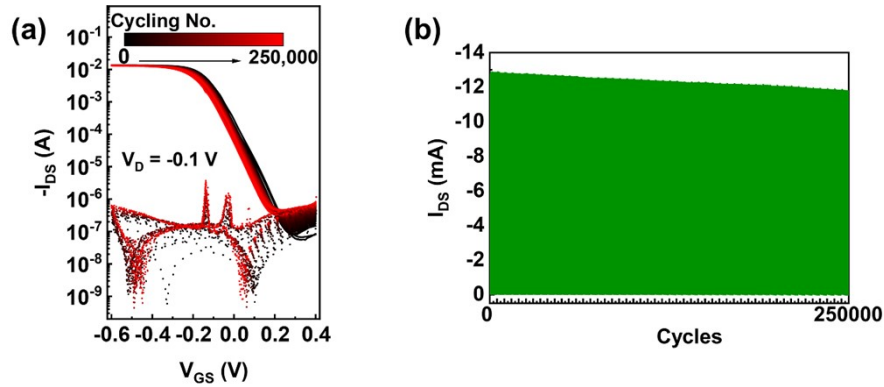

63

64 **Figure S11.** (a) Transfer characteristics of vertical p(g2T-T): DtFDA OECT during the cycling stability  
 65 measurements with the  $V_G$  switches from -0.4 V to +0.4 V. (b) Change of  $I_D$  over time of vertical  
 66 p(g2T-T): DtFDA OECT with  $V_G$  switches from -0.4 V to +0.4 V ( $V_G$  square pulse of 25 Hz,  
 67  $V_D = -0.1$  V).

68



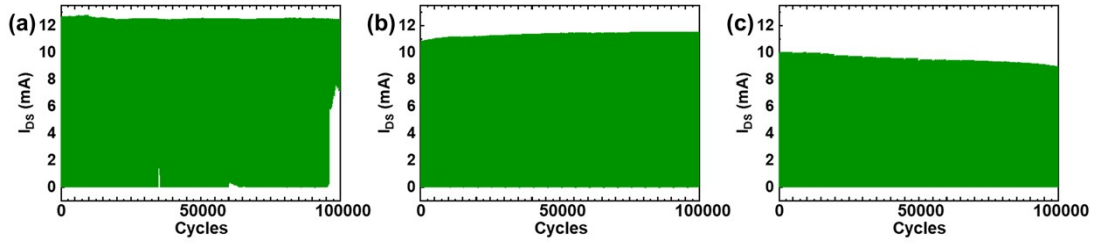

69

70 **Figure S12.** Change of  $I_D$  over time of vertical Homo-gDPP: DtFDA OECTs under different  $V_G$  pulses  
 71 ( $V_G$  square pulse of 25 Hz,  $V_D = 0.1$  V): (a) 0 V to +0.9 V, (b) 0 V to +0.8 V and (c) 0 V to +0.7 V.

72

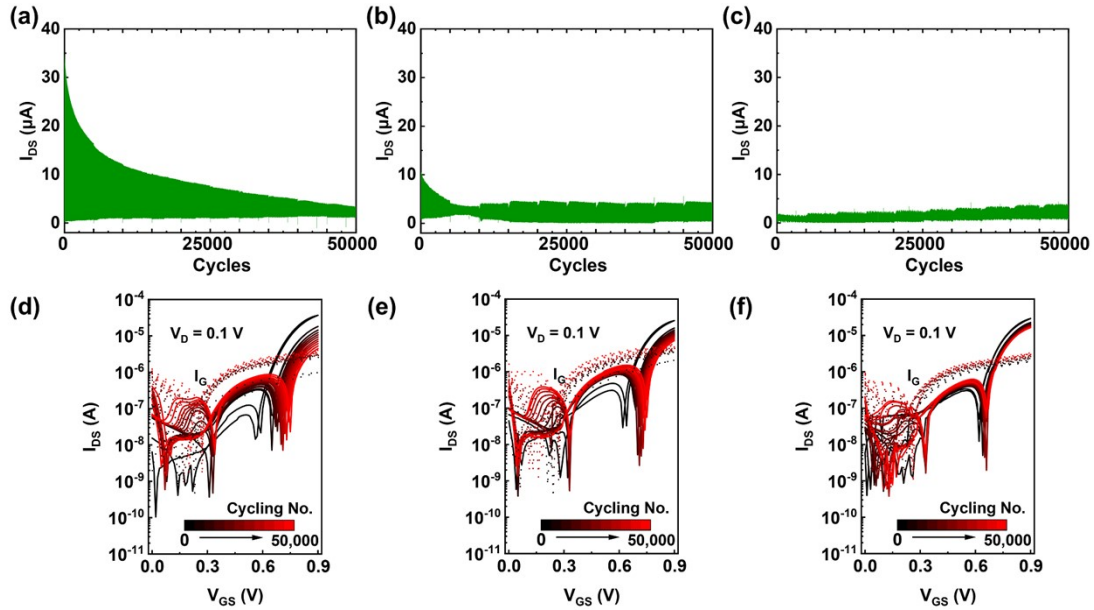

73

74 **Figure S13.** (a)-(c) Change of  $I_D$  over time of planar Homo-gDPP: DtFDA OECTs under different  $V_G$   
 75 pulses ( $V_G$  square pulse of 25 Hz,  $V_D = 0.1$  V): (a)  $V_G$  from 0 V to +0.9 V, (b)  $V_G$  from 0 V to +0.8 V and  
 76 (c)  $V_G$  from 0 V to +0.7 V. (d)-(f) Transfer characteristics of n-type planar OECTs with Homo-gDPP:  
 77 DtFDA mixture during the cycling stability measurements with the  $V_G$  switches from (d) 0 V to +0.9 V,  
 78 (e) 0 V to +0.8 V and (f) 0 V to +0.7 V.
